# Supplementary material for: Temporal and Spatial Gene Expression Profile of Stroke Recovery Genes in Mice
Source: MDPI journal article supplement (doi:10.3390/genes14020454), 2023-02-09
Supplement: s1 [file s1]

## Supplementary Materials

**Table S1.** Specification of forward and reverse primer pairs (Eurofins)

| Name        | Sequence 5' -> 3'        | Weight [g/mol] | gDNA Amplification |
|-------------|--------------------------|----------------|--------------------|
| Adora2a For | ACTCCGGTACAATGGCTTGGTG   | 6766           | Possibly           |
| Adora2a Rev | CCCAGCAAATCGCAATGATGCC   | 6673           | Possibly           |
| Pde10a For  | TACGTGGCCAAGTCTAGGAAGACG | 7427           | No                 |
| Pde10a Rev  | TACCTCGAGGAAATCGCTCATCCC | 7258           | No                 |
| Drd2 For    | ACCTGAAGACACCACTCAAGGG   | 6722           | No                 |
| Drd2 Rev    | ACGGTGCAGAGTTTCATGTCCTC  | 7031           | No                 |
| Gapdh For   | CATGGCCTTCCGTGTTCTTA     | 6035           | ?                  |
| Gapdh Rev   | GCGGCACGTCAGATCCA        | 5180           | ?                  |

**Table S2.** List of used primers from BioRad. Note that these are premixed primers and, therefore, contain forward and reverse primers

| Name   | Unique Assay ID | Assay Design |
|--------|-----------------|--------------|
| Atrx   | qMmuCED0048169  | Exonic       |
| Lingo1 | qMmuCED0026351  | Exonic       |
| Bdnf   | qmMuCED0048169  | Exonic       |

**Table S3.** List of Primer efficiencies.

| Primer | Efficiency |
|--------|------------|
| Adora2 | 1.99       |
| Pde10a | 1.95       |
| Drd2   | 2.07       |
| Lingo1 | 1.90       |
| Atrx   | 1.94       |
| Bdnf   | 1.84       |
| Nos1   | 1.80       |
| Gapdh  | 1.97       |

**Table S4.** The recovery rate of stroke mice calculated from grid walk (footfault) and rotating beam (speed and hindlimb drop) was via linear regression between days 3 to 14 post stroke (P3-P14) (left) and P3 to P7 to P14 (right). The median results of single tests were taken for the differentiation between good and poorly recovered mice. Medians P3-P14: Footfaults -0.25, RB Speed 0.73, HL drop -0.6; Medians P3-P7-P14: Footfaults -0.40, RB Speed 0.80, HL drop -0.6. Grey filling indicated poorly recovered mice.

|          | P3 - P14   |          |         |          | P3-P7-P14  |          |         |
|----------|------------|----------|---------|----------|------------|----------|---------|
| Mouse ID | Footfaults | RB Speed | HL Drop | Mouse ID | Footfaults | RB Speed | HL Drop |
| T3_3_1   | -0.15      | 0,81     | -0.05   | T3_3_1   | -0.19      | 0,82     | -0.07   |
| T3_3_2   | 0,30       | 0,49     | -0.02   | T3_3_2   | 0,31       | 0,48     | -0.04   |
| T3_4_2   | -0.53      | 1,00     | 0,05    | T3_4_2   | -0.51      | 0,96     | 0,00    |
| T3_4_3   | -1.14      | 0,54     | -0.01   | T3_4_3   | -1.13      | 0,61     | 0,00    |
| T3_4_4   | -0.61      | 0,49     | -0.16   | T3_4_4   | -0.70      | 0,51     | -0.16   |
| T3_4_5   | -0.45      | 0,73     | 0,01    | T3_4_5   | -0.49      | 0,80     | 0,00    |
| T3_5_2   | -0.30      | 1,11     | -0.07   | T3_5_2   | -0.34      | 0,97     | -0.06   |
| T3_6_1   | -0.25      | 1,46     | 0,02    | T3_6_1   | -0.25      | 1,46     | 0,02    |
| T3_7_2   | 0,08       | 1,29     | -0.30   | T3_7_2   | 0,08       | 1,29     | -0.30   |
| T3_8_1   | 0,76       | 0,96     | -0.10   | T3_8_1   | 0,76       | 0,96     | -0.10   |
| T3_8_3   | 0,24       | 0,45     | -0.39   | T3_8_3   | 0,24       | 0,45     | -0.39   |
| T3_8_4   | -0.45      | 0,81     | -0.07   | T3_8_4   | -0.45      | 0,81     | -0.07   |
| T3_8_5   | -0.23      | -0.14    | -0.05   | T3_8_5   | -0.23      | -0.14    | -0.05   |
| T3_9_1   | -1.00      | 0,42     | -0.70   | T3_9_1   | -0.92      | 0,38     | -0.64   |
| T3_9_3   | 0,15       | 0,44     | -0.75   | T3_9_3   | 0,09       | 0,44     | -0.67   |
| T3_9_4   | -0.58      | 0,29     | -0.11   | T3_9_4   | -0.54      | 0,23     | -0.10   |
| T3_10_2  | 0,20       | 0,84     | -0.11   | T3_10_2  | 0,29       | 0,80     | -0.11   |
| T3_10_3  | -0.45      | -0.03    | -0.02   | T3_10_3  | -0.40      | -0.02    | -0.02   |
| T3_12_1  |            | 1,13     | 0,00    | T3_12_1  | -0.42      | 1,06     | 0,00    |
| T3_12_2  |            | 1.43     | 0.00    | T3_12_2  | 0.42       | 1.28     | 0.00    |
| T3_12_4  |            | 0.71     | -0.05   | T3_12_4  | -0.84      | 0.7      | -0.03   |
| T3_13_4  |            | 0.39     | 0.05    | T3_13_4  | 0.42       | 0.29     | 0.05    |
| T3_14_1  |            | 0.99     | -0.16   | T3_14_1  | -1.46      | 0.86     | -0.15   |
| T3_14_3  |            | 0,70     | 0,00    | T3_14_3  | -0.84      | 0,65     | 0,00    |
| T3_14_5  |            | 1,24     | -0.09   | T3_14_5  | -0.83      | 1,21     | -0.08   |

**Table S5.** Mice can be grouped into good recovery, neutral, or poor recovery mice according to their results in grid walk and rotating beam tests

| Good Recovery |            | Neutral   | Poor Recovery |            |
|---------------|------------|-----------|---------------|------------|
| PB_T3_4_2     | PB_T3_4_4  | PB_T3_3_1 | PB_T3_3_3     | PB_T3_4_3  |
| PB_T3_5_2     | PB_T3_7_2  | PB_T3_4_5 | PB_T3_8_3     | PB_T3_8_5  |
| PB_T3_8_1     | PB_T3_8_4  | PB_T3_6_1 | PB_T3_9_3     | PB_T3_10_3 |
| PB_T3_9_1     | PB_T3_9_4  |           | PB_T3_12_4    | PB_T3_13_4 |
| PB_T3_10_2    | PB_T3_12_1 |           | PB_T3_14_3    |            |
| PB_T3_12_2    | PB_T3_14_1 |           |               |            |
| PB_T3_14_5    |            |           |               |            |

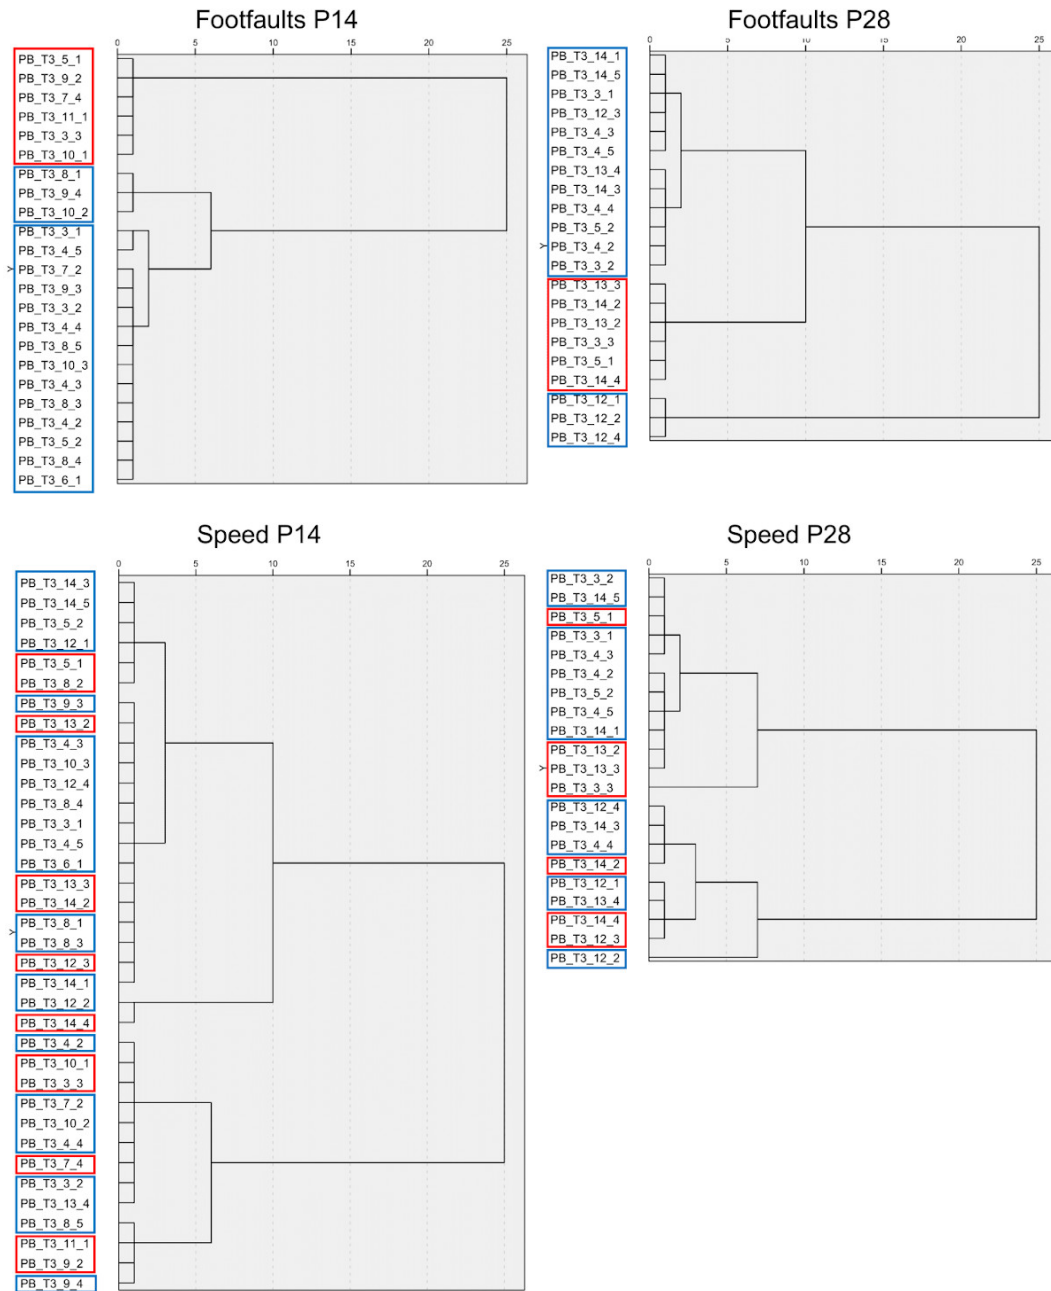

**Figure S1: Dendrograms of cluster analysis by SPSS from days 14 and 28 after stroke for foot faults at the grid walk test and speed of the rotating beam test. Red and blue frames mark sham and stroke animals, respectively. The x-axis shows the distance between the clusters with a range of 1-25, whereby at 1, every individual data point is a cluster. The y-axis shows the data points.**

### Key findings (comparison good/poor vs. sham mice, Figure S2)

MOp: showed higher expressions of *Adora2a*, *Pde10a*, and *Drd2* at P14/56, whereas *Lingo1* and *BDNF* had lower expressions at P14 and *Atrx* lower expressions at P14 and higher expressions at P56.

SSp: expression of *Adora2a*, *Pde10a*, and *Drd2* in the SSp increased at P28 and P56 and was higher in the good recovery group, whereas expression of *Lingo1*, *BDNF*, and *Atrx* showed unclear or no change in expression over all time points.

Str: Well- recovered mice showed a higher expression of *Adora2a*, *Pde10a*, and *Drd2* at 28 days post-stroke in the il Str, while *Lingo1* and *BDNF* had increased expressions at P56, and *Atrx* showed unclear or no change.

TH: *Adora2a* and *Pde10a* in the TH were more expressed at P56, mainly in well-recovered mice, while *Drd2* was downregulated at 28 days post-stroke and upregulated at P56. *Lingo1*, *BDNF*, and *Atrx* showed unclear or no change.

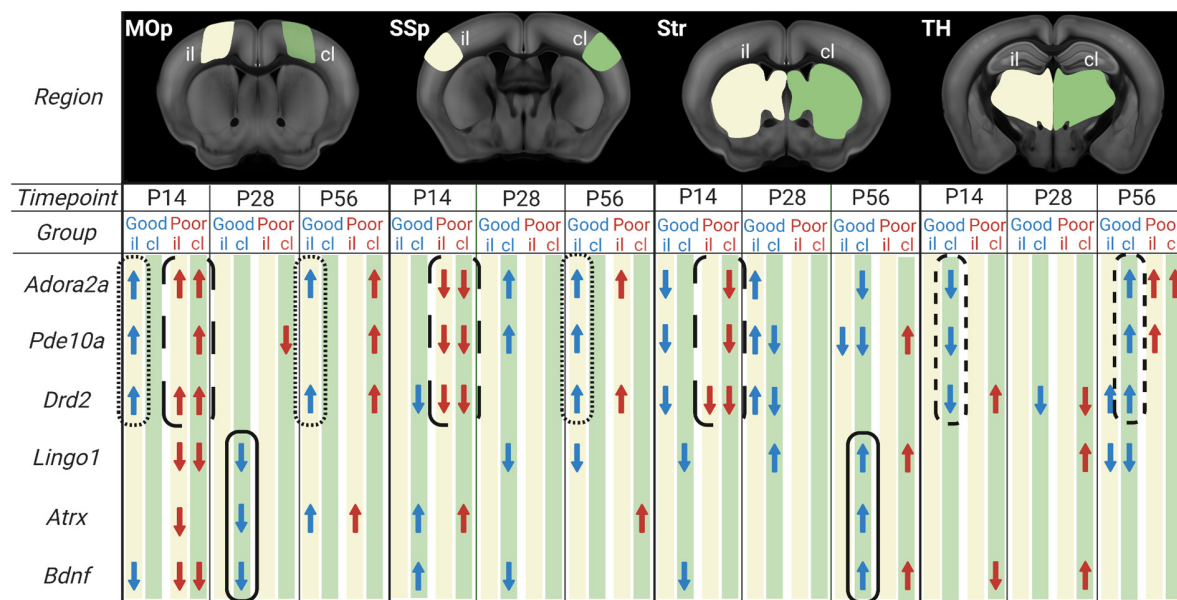

**Figure S2. Gene expression summary at 14, 28, and 56 days post-stroke compared to sham.** Gene expression analysis results of well (blue) and poorly (red) recovered mice, compared to sham, divided into brain parts, hemisphere (yellow and green), and days post-stroke (P14, P28, P56). Patterns were marked with different dotted lines. Figure created with BioRender.com (accessed on 28 December 2022).
